# Supplementary material for: Syngeneic N1-S1 Orthotopic Hepatocellular Carcinoma in Sprague Dawley Rat for the Development of Interventional Oncology-Based Immunotherapy: Survival Assay and Tumor Immune Microenvironment
Source: MDPI journal article supplement (doi:10.3390/cancers15030913), 2023-01-31
Supplement: s1 [file s1]

**Syngeneic N1-S1 Orthotopic Hepatocellular Carcinoma in Sprague Dawley Rat for the Development of Interventional Oncology-based Immunotherapy: Survival assay and Tumor Immune Microenvironment**

*Bongseo Choi<sup>1+</sup>, Jason Pe<sup>1+</sup>, Bo Yu<sup>1\*</sup>, and Dong-Hyun Kim,<sup>1,2,3,4\*</sup>*

<sup>1</sup>Department of Radiology, Feinberg School of Medicine, Northwestern University, Chicago, IL 60611, USA

<sup>2</sup>Department of Biomedical Engineering, McCormick School of Engineering, Northwestern University, Evanston, IL 60208, USA

<sup>3</sup>Robert H. Lurie Comprehensive Cancer Center, Northwestern University, Chicago, IL 60611, USA

<sup>4</sup>Department of Biomedical Engineering, University of Illinois at Chicago, Chicago, IL 60607, USA

+ These authors contributed equally to this work.

**\*Corresponding Authors:** Dr. Bo Yu (bo.yu@northwestern.edu) and Prof. Dong-Hyun Kim (dhkim@northwestern.edu)

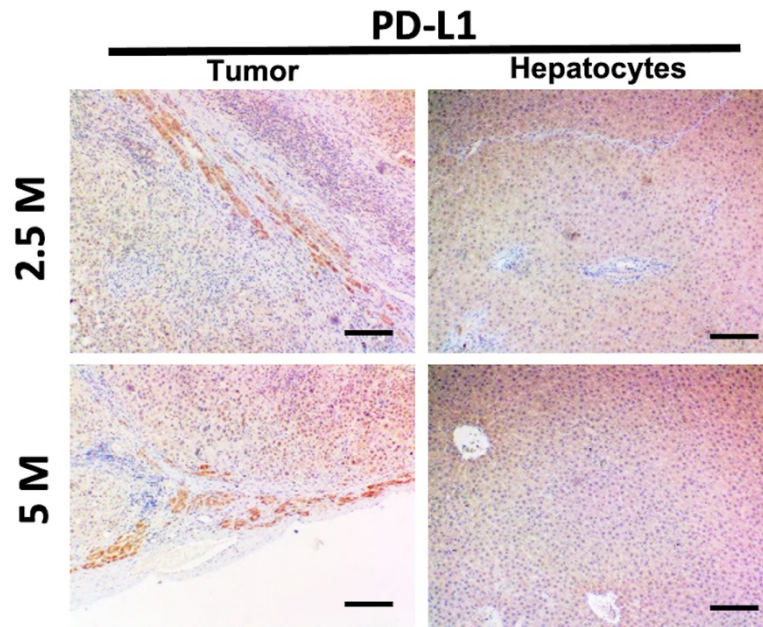

**Figure S1.** Immunohistology analysis of N1-S1 HCC tumor generated with a subcapsular N1-S1 cells (2.5 and 5 million N1-S1 cells) implantation in Sprague Dawley rats. PD-L1 (positive brown signal) stained images of tumor and peripheral hepatic region. Scale bars: 150  $\mu$ m.

### T cell gating strategy

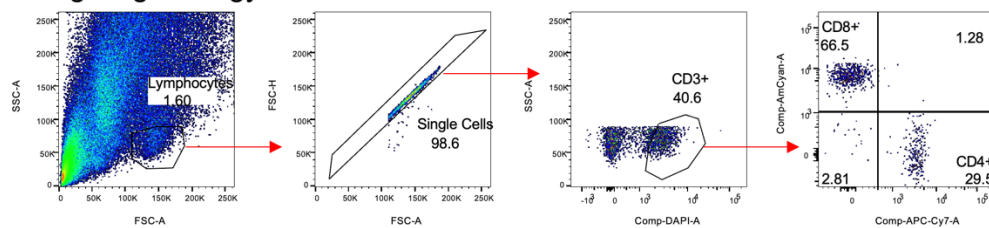

### Treg gating strategy

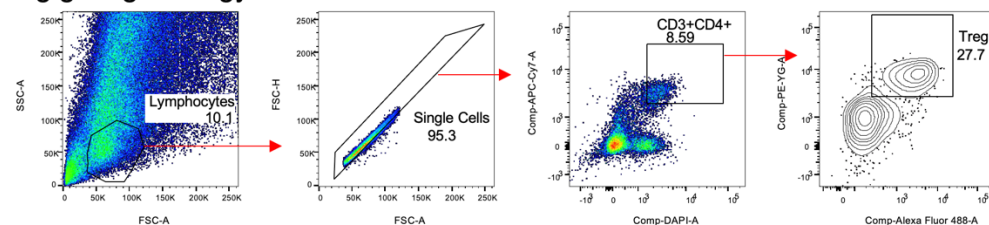

### PD-1/PD-L1 gating strategy

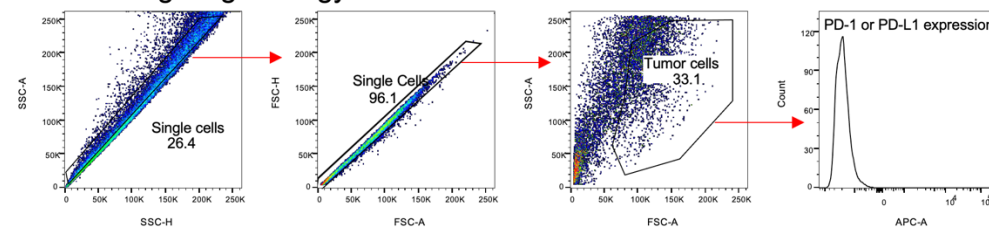

**Figure S2. Gating strategies for flowcytometry analysis.** All samples were primarily gated from the lymphocytes and single cells gates.

**Table S1.** Antibodies used for flowcytometry

| Antibody      | Provider  | Clone             | Catalogue Number | Dilution          | Identification of what cell phenotypes       |
|---------------|-----------|-------------------|------------------|-------------------|----------------------------------------------|
| CD3-PE        | Biolegend | 1F4               | 201412           | 1:400 (0.5 ug/mL) | T lymphocyte                                 |
| CD4-PEcy7     | Biolegend | W3/25             | 201516           | 1:200 (1 ug/mL)   | Peripheral T cell subset (helper T cells)    |
| CD25-APCcy7   | Biolegend | OX-39             | 202114           | 1:200 (1 ug/mL)   | IL-2 receptor $\alpha$ chain                 |
| FoxP3-PECF594 | Biorbyt   | Polyclonal        | orb156940-CF594  | 1:500 (1 ug/mL)   | Forkhead box P3 (regulatory T cells)         |
| PD-1-APC      | Bioss     | Polyclonal        | Bs-1867R-A647    | 1:200 (5 ug/mL)   | PD-1/CD279                                   |
| PD-L1-APC     | NovusBio  | Polyclonal (6H12) | NBP1-76769APC    | 1:100 (2.5 ug/mL) | PD-L1/CD274                                  |
| CD8-FITC      | LSBio     | Monoclonal        | LS-C12709-50     | 1:10 (10 ug/mL)   | Peripheral T cell subset (cytotoxic T cells) |
